# Supplementary material
Source: PubMed Central journal article supplement (PMC3204869)
Supplement: NIHMS319021-supplement-2_si_002.pdf [file NIHMS319021-supplement-2_si_002.pdf]

|                        |                          |           |           |                      |                                                                                                                                                                                    |                           |                                |     |       |       |       |       |
|------------------------|--------------------------|-----------|-----------|----------------------|------------------------------------------------------------------------------------------------------------------------------------------------------------------------------------|---------------------------|--------------------------------|-----|-------|-------|-------|-------|
| FAADAKLKR              | Acetyl (K)               | 1174.6346 | -0.03033  | IP00124692           | Transaldolase                                                                                                                                                                      | Tal;Taldo;Taldo1          | Q93992                         | 2   | 0.13% | 0.11% | 0.11% | 0.02% |
| VSSSICITGTEAEK         | Acetyl (K)               | 1545.7886 | 0.76776   | IP00114498;IP014-3-3 | protein eta/delta/protein kinase C inhibitor protein 1.5E12.2;Putative uncharacterized protein                                                                                     | Wtwz;Wtwz                 | PI3101;Q3UAS5;Q8I              | 2   | 0.12% | 0.02% | 0.11% | 0.02% |
| AALADGKFR              | Acetyl (K)               | 1115.6451 | -1.9768   | IP00462385           | Purkinje cell protein 4-like protein 1                                                                                                                                             | Pcp4l1                    | Q8W8Q3;Q8C9J2                  | 2   | 0.12% | 0.12% | 0.09% | 0.00% |
| ADKDFHVVQNDVNEHQLSLR   | Acetyl (K)               | 2614.2048 | 1.5474    | IP00127415;IP00      | Nuclear phosphoprotein B23;Nuclear protein B23;Nucleophosmin;Nupm1;Putative uncharacterized protein;MCG68069;Nup Npm1;mcG_48069;RP23-32318.2                                       | NCN1                      | Q61917;Q3U536;Q51              | 3   | 0.12% | 0.11% | 0.10% | 0.02% |
| TNDKLEGGHDFDR          | Acetyl (K) Oxidation (M) | 1979.951  | -4.7653   | IP00308885;IP00      | 80 kDa chaperonin 80 kDa heat shock protein, mitochondrial;Chaperonin 80;Heat shock protein 80;HSP-65;Mitochondrial matrix protein Hsp65;Hsp61                                     |                           | PI3038;Q3HQP2;Q3L              | 3   | 0.11% | 0.1%  | 0.0%  | 0.0%  |
| AKDKEMFKLQLK           | Acetyl (K) Oxidation (M) | 2002.0293 | 3.2179    | IP00278611;IP00      | Gamma-tropomyosin;Troponin alpha 3 chain;Troponin alpha 3;Troponin alpha 1, gamma;Putative uncharacterized protein                                                                 | Tpm1;Tpm5;Tpm-5;Tpm3;Tpm3 | PI1107-1;P12117;Q8I            | 2   | 0.10% | 0.11% | 0.09% | 0.00% |
| VYMLDQETK              | Acetyl (K)               | 1263.6711 | -0.69382  | IP002128345;IP00     | Complex I 13kD-A;NADH dehydrogenase [ubiquinone] iron-sulfur protein 6, mitochondrial;NADH ubiquinone oxidoreductase 13 kDa ip13;Ndu6f6                                            |                           | PI5293                         | 2   | 0.10% | 0.03% | 0.1%  | 0.0%  |
| LGPIEGKPVYVWYDYSK      | Acetyl (K)               | 2152.0476 | 0.0028228 | IP001212529          | Complex I MLQ2;NADH dehydrogenase [ubiquinone] alpha subcomplex subunit 4;NADH ubiquinone oxidoreductase MLQ2 subun Ndu4a                                                          |                           | GI2425                         | 2   | 0.10% | 0.17% | 0.07% | 0.15% |
| AVLDKQCTFK             | Acetyl (K)               | 1268.6976 | 2.1196    | IP00154047           | 3-hydroxyubiquinyl CoA hydrolase, mitochondrial;3-hydroxyubiquinyl coenzyme A hydrolase                                                                                            | Hbh3                      | Q80511                         | 2   | 0.10% | 0.02% | 0.0%  | 0.0%  |
| ANVAKGLVDQFEK          | Acetyl (K)               | 1543.7382 | -4.8556   | IP00230507;IP0ATP    | synthase subunit 6, mitochondrial                                                                                                                                                  |                           | Q10CC3;A2A8X4                  | 2   | 0.10% | 0.11% | 0.0%  | 0.0%  |
| ANLEAKELGGADGDEAR      | Acetyl (K)               | 1971.9098 | 0.091154  | IP002451777          | ATP synthase subunit delta, mitochondrial;ATPase delta subunit;ATP synthase, H+ transporting, mitochondrial F1 complex, delta subunit;mcG_13414                                    |                           | GI01009;GI01974;Q8I            | 2   | 0.09% | 0.06% | 0.06% | 0.00% |
| FIFLFAWQVQK            | Acetyl (K)               | 1504.4078 | 5.5992    | IP00232014           | D-3-isopantetheine decarboxylase;D-3-isopantetheine decarboxylase;Putative uncharacterized protein                                                                                 | DETCmcG_13414             | Q19125;Q3UN98                  | 2   | 0.09% | 0.16% | 0.43% | 0.14% |
| TIKQDLPKQVDMVTR        | Acetyl (K) Oxidation (M) | 1905.9006 | 1.3117    | IP00221769           | Adenylate kinase 3;Adenylate kinase 3 alpha like 1;GTP:AMP phosphotransferase mitochondrial;Putative uncharacterized protein                                                       | Ak3;AK3L1;AK3L1;AK3L1     | Q0W7P7;Q08W6                   | 2   | 0.08% | 0.15% | 0.0%  | 0.0%  |
| IQADKQDQDVF            | Acetyl (K)               | 1860.7099 | -0.32463  | IP001118318          | HINT 3;Histidine triad nucleotide-binding protein 2, mitochondrial;Histidine triad nucleotide-binding protein 2;MCG15276                                                           |                           | Q105000;Q3M952                 | 2   | 0.08% | 0.05% | 0.0%  | 0.0%  |
| YGLSDGKFFPK            | Acetyl (K) Oxidation (M) | 1845.8244 | 0.29052   | IP00120441           | 14 kDa selenium-binding protein;Fatty acid-binding protein, liver;Liver-type fatty acid-binding protein;Fahp3;Fahp3;Q8I                                                            |                           | PI2710;Q3V277                  | 2   | 0.08% | 0.07% | 0.0%  | 0.0%  |
| AGEIDQDVFQNLK          | Acetyl (K)               | 1732.838  | 0.78759   | IP002471246          | Isovaleryl-CoA dehydrogenase, mitochondrial                                                                                                                                        | Ivd                       | Q8H95                          | 2   | 0.08% | 0.07% | 0.0%  | 0.0%  |
| WLSHGDVYLVGDK          | Acetyl (K)               | 1626.8178 | 4.0894    | IP001331241;IP00     | Glutathione S-transferase A3;Glutathione S-transferase Ya3;Glutathione S-transferase Yc;GST class-alpha member 3;Glutathione S-transferase Ya3;Gsta3;Gsta3;Gsta3;Gsta3;Gsta3;Gsta3 |                           | PI0115;Q2A4Y6;Q8I              | 2   | 0.08% | 0.06% | 0.08% | 0.02% |
| QSSDVSQSSSKQK          | 2 Acetyl (K)             | 1828.8337 | 2.4462    | IP001383376;IP00     | Inhibitor of growth protein 6;29H964                                                                                                                                               |                           | ING1;Ing1;Ing1;Ing1            | 2   | 0.08% | 0.01% | 0.00% | 0.00% |
| EHSPVGLVHGVAINTTKDPREK | Acetyl (K)               | 2649.3259 | 5.947     | IP00110843           | Agmatinase, mitochondrial;Agmatinase ureohydrolase;Agmat protein                                                                                                                   | Agmat                     | A2A389;Q148N7;Q8I              | 3   | 0.08% | 0.07% | 0.10% | 0.02% |
| YDPSKDKDTNPPPK         | Acetyl (K)               | 1963.9527 | 0.32564   | IP00114903           | 75 kDa glucose-regulated protein;Heat shock 70 kDa protein 9;Hortalin;p66 MDT;Peptide-binding protein 74;Stress-70 protein, mit;Grp75;Hsp74;Hsp70;Hsp70;Hsp70;Hsp70;Hsp70;Hsp70    |                           | PI08447;Q3I9W5;Q8I             | 2   | 0.08% | 0.06% | 0.11% | 0.00% |
| ANTYVAELGDPAR          | Acetyl (K)               | 1642.8679 | 1.1112    | IP00132192;IP0MA     | dehydrogenase, mitochondrial                                                                                                                                                       | Mdb3;Mdb-1;Mdb3;Mdb1      | PI08448;Q0844;Q8I              | 2   | 0.07% | 0.13% | 0.07% | 0.0%  |
| TGEEYEEAAR             | Acetyl (K)               | 1738.8374 | -1.8506   | IP00131177           | LETM1 and EF-hand domain-containing protein 1, mitochondrial;Leucine zipper-EF-hand-containing transmembrane protein 1                                                             | Letm1                     | Q8Z20                          | 3   | 0.07% | 0.06% | 0.13% | 0.05% |
| YKAAAEK                | Acetyl (K)               | 912.36442 | -0.3995   | IP00121440;IP0D      | electron transfer flavoprotein subunit beta                                                                                                                                        | Etfb                      | Q7Q5H4                         | 2   | 0.07% | 0.12% | 0.23% | 0.02% |
| FQHTCYEENK             | Acetyl (K) Oxidation (M) | 1848.8175 | 1.4908    | IP00118447;IP0P      | purine-rich single-stranded DNA-binding protein alpha;Transcriptional activator protein Pur-alpha;Putative uncharacterized protein                                                 | Pura                      | PI4369;Q8CE69                  | 2,3 | 0.07% | 0.06% | 0.0%  | 0.0%  |
| GLDPMPLPKAAASGK        | Acetyl (K) Oxidation (M) | 1816.9029 | 1.5797    | IP00116154;IP0D      | Cytochrome c oxidase, subunit Vb;MCG17741, isoform CRA_6;MCG23026;Novel protein similar to cytochrome c oxidase, subunit V; Cox5b;mcG_17741;mcG_23026;RP5;Q08081;P19536            |                           | Q08081;P19536                  | 2   | 0.07% | 0.07% | 0.20% | 0.00% |
| SKLVQVLSK              | Acetyl (K)               | 1179.7276 | -0.11859  | IP00131142;IP0D      | Peptide methionine sulfoxide reductase;Peptide-methionine (S)-S-oxide reductase;Protein-methionine-S-oxide reductase;Methionin MsrsmcG_13870;MsrA                                  |                           | GI047;Q3I807;Q8I               | 3   | 0.06% | 0.06% | 0.04% | 0.01% |
| YTAIQQLEK              | Acetyl (K)               | 1707.8203 | -1.4794   | IP00216507;IP0ATP    | synthase subunit 6, mitochondrial                                                                                                                                                  |                           | Q10CC3;A2A8X4                  | 2   | 0.06% | 0.05% | 0.10% | 0.02% |
| GGNEISTKYNAGSR         | Acetyl (K)               | 1505.6706 | 1.729     | IP00130589;IP0D      | superoxide dismutase [Cu-Zn]                                                                                                                                                       | Sod1                      | P08228                         | 2   | 0.06% | 0.06% | 0.07% | 0.0%  |
| SDFVYDTYDQK            | Acetyl (K)               | 1779.8023 | 4.8686    | IP00131162;IP0D      | Colicid-coil helix-coil-coil-helix domain-containing protein 1, mitochondrial;Chch3;Chch3                                                                                          | Chch3;Chch3               | Q10499;Q21VQ6;Q8I              | 2   | 0.05% | 0.05% | 0.1%  | 0.0%  |
| AVTAEKIPQYDQK          | Acetyl (K)               | 1999.9815 | -2.4441   | IP00221769           | Adenylate kinase 3;Adenylate kinase 3 alpha like 1;GTP:AMP phosphotransferase mitochondrial;Putative uncharacterized protein                                                       | Ak3;AK3L1;AK3L1;AK3L1     | Q0W7P7;Q08W6                   | 2   | 0.05% | 0.09% | 0.14% | 0.04% |
| TVVVAETHKQK            | Acetyl (K)               | 1655.8883 | 4.2969    | IP00455280;IP0D      | DCS-1;Hint-related 7;mcGMP-directed hydrolase;Histidine triad protein member 5;Scavenger mRNA-decapping enzyme Dcp5;Putative Dcp5;Hint5;Dcps                                       |                           | Q104R7;Q3BTW9                  | 2   | 0.05% | 0.00% | 0.05% | 0.0%  |
| GUVYLVYVYENK           | Acetyl (K)               | 1803.9049 | -3.262    | IP00550203           | Glutathione S-transferase P 1;GST class pi;GST TF-YF;GST piL;Peadpocyte growth factor                                                                                              | Gtp1;Gtp1p                | PI19157                        | 2   | 0.05% | 0.06% | 0.06% | 0.00% |
| VGSDVQVYENKDK          | Acetyl (K)               | 1678.832  | 5.487     | IP00308885;IP00      | 80 kDa chaperonin 80 kDa heat shock protein, mitochondrial;Chaperonin 80;Heat shock protein 80;HSP-65;Mitochondrial matrix protein Hsp65;Hsp61                                     |                           | PI3038;Q3HQP2;Q3L              | 3   | 0.04% | 0.00% | 0.0%  | 0.0%  |
| ANDSKYGLAAATFK         | Acetyl (K)               | 1596.8148 | -2.4889   | IP00111218           | AHD-M1;Aldehyde dehydrogenase, mitochondrial;ALDH class 2;ALDH-E2;ALDH1;Putative uncharacterized protein;Aldehyde dehydrogenase A1;Ahd1;Ahd1;Ahd1;Ahd1                             |                           | PI7738;Q3TVM2;Q3L              | 2   | 0.04% | 0.08% | 0.07% | 0.03% |
| QLKATMFAK              | Acetyl (K)               | 1432.7562 | 0.79429   | IP00308584;IP0D      | Colicid-coil domain-containing protein 50b, mitochondrial                                                                                                                          | Cdc90b;cdc90b             | Q10C42;Q097C7;Q8I              | 2   | 0.04% | 0.07% | 0.06% | 0.00% |
| TIKELASGR              | Acetyl (K)               | 1085.6193 | 2.1661    | IP00113298           | Acyl-coenzyme A thioesterase 13;Thioesterase superfamily member 2                                                                                                                  | Acsl13;Thm12              | Q10C26;Q3GZV7                  | 2   | 0.04% | 0.01% | 0.0%  | 0.0%  |
| EHKQLQKCVK             | Acetyl (K)               | 1500.6701 | 1.239     | IP00455337;IP0D      | Complex III subunit 6;Complex III subunit VIII;Cytochrome b-c1 complex subunit 6, mitochondrial;Cytochrome c1 non-heme 11 kDa Ucpb                                                 |                           | P99028;A2A809;Q8I              | 2   | 0.04% | 0.07% | 0.04% | 0.0%  |
| VNTEFMKAAR             | Acetyl (K) Oxidation (M) | 1294.634  | -0.8341   | IP00130661           | Lysosomal peptidase-insensitive protease;Tripeptidyl aminopeptidase;Tripeptidyl peptidase 1;Tripeptidyl peptidase 1;Putative uncharacterized protein;Hsp10;Hsp10;Hsp10;Hsp10       |                           | Q69023;Q3ITD5;Q3L              | 2   | 0.03% | 0.06% | 0.10% | 0.0%  |
| VSLGSDQNK              | Acetyl (K)               | 1250.6656 | 0.51097   | IP00465114           | Alpha-globin;Hemoglobin alpha chain;Hemoglobin subunit alpha;Alpha-globin mRNA;Putative uncharacterized protein;Alpha-globin Hba-Hba-1;Hba-1;Hba-2;Hba-2;Hba-2                     |                           | PI3406;Q3I875;Q51              | 2   | 0.03% | 0.03% | 0.1%  | 0.0%  |
| LTVLTHHHWGHGQENLKV     | Acetyl (K)               | 2535.2883 | -1.7537   | IP00115866           | Glyoxalase II;Hydroxymethylglutathione hydrolase, mitochondrial                                                                                                                    | Glx2;Hgh                  | Q99K88;Q3TMR4;Q3L              | 3   | 0.02% | 0.04% | 0.0%  | 0.0%  |
| PVYEAQDQK              | Acetyl (K)               | 1246.8538 | -0.79456  | IP00113440;IP0D      | cell receptor-associated protein 32;Phosphoinositide-3-OH kinase C inhibitor protein 1.5E12.2;Putative uncharacterized protein;RIKEN cDNA 1700071A03 gene                          |                           | PIb;170071A03;RIK;mcG_48927;Ph | 2   | 0.01% | 0.02% | 0.1%  | 0.0%  |
| VSSKQTEGAEK            | Acetyl (K)               | 1673.8636 | 4.9726    | IP00114498;IP014-3-3 | protein eta/delta/protein kinase C inhibitor protein 1.5E12.2;Putative uncharacterized protein                                                                                     | Wtwz;Wtwz                 | PI3101;Q3UAS5;Q8I              | 2   | 0.01% | 0.01% | 0.0%  | 0.0%  |
