# Supplementary material
Source: PubMed Central journal article supplement (PMC3204869)
Supplement: NIHMS319021-supplement-3_si_003.pdf [file NIHMS319021-supplement-3_si_003.pdf]

| Index | Protein accession | Protein name                                                               | Theoretical mass | Delta mass (ppm) | Expected score | Peptide sequence                 | Variable modification       | Variable modification position     |
|-------|-------------------|----------------------------------------------------------------------------|------------------|------------------|----------------|----------------------------------|-----------------------------|------------------------------------|
| 1     | IP00116074        | Aconitate hydratase, mitochondrial precursor                               | 1047.6077        | 4.295501074      | 0.0016         | AIIKFSAR                         | Acetyl (K)                  | 0.000010000.0                      |
| 2     | IP00116074        | Aconitate hydratase, mitochondrial precursor                               | 1530.8405        | 5.879123266      | 0.0011         | YDLLENINIVR                      | Acetyl (K)                  | 0.000001020000.0                   |
| 3     | IP00116074        | Aconitate hydratase, mitochondrial precursor                               | 1541.7725        | 8.107551356      | 0.016          | KLEAPDADELPR                     | Acetyl (K)                  | 0.010000000000.0                   |
| 4     | IP00116074        | Aconitate hydratase, mitochondrial precursor                               | 1900.0254        | 4.787410200      | 0.089          | CTTHDSAGSPVLKFR                  | Acetyl (K)                  | 0.00000000000000.0                 |
| 5     | IP00117978        | Cytochrome c oxidase subunit 4 isoform 1, mitochondrial precursor          | 1324.5724        | 4.765251904      | 0.063          | WDYDKNEWK                        | Acetyl (K)                  | 0.000010000.0                      |
| 6     | IP00117978        | Cytochrome c oxidase subunit 4 isoform 1, mitochondrial precursor          | 2154.0018        | 5.10677382       | 3.60E-06       | AHGSVSKSEDAFYPTAADR              | Acetyl (K)                  | 0.000000100000000000.0             |
| 7     | IP00117978        | Cytochrome c oxidase subunit 4 isoform 1, mitochondrial precursor          | 2310.1029        | 5.1945738        | 1.90E-05       | AHGSVSKSEDAFYPTAADR              | Acetyl (K)                  | 0.00000010000000000000.0           |
| 8     | IP00315794        | Cytochrome b5 type 8 precursor                                             | 1800.9046        | 3.553769589      | 0.089          | QYVIGDVHPSDLKPK                  | Acetyl (K)                  | 0.000000000000100.0                |
| 9     | IP00315794        | Cytochrome b5 type 8 precursor                                             | 2318.1616        | 1.854918139      | 0.047          | EMLKQYGVIGDVHPSDLKPK             | Acetyl (K); Oxidation (M)   | 0.020100000000000000.0             |
| 10    | IP00315794        | Cytochrome b5 type 8 precursor                                             | 2442.1187        | 0.573272708      | 0.1            | ATPEASGSGKEGVSESPVTVYR           | Acetyl (K)                  | 0.00000000000000000000.0           |
| 11    | IP00121440        | Electron transfer flavoprotein subunit beta                                | 912.5644         | 1.205394381      | 0.033          | VLAKLAEK                         | Acetyl (K)                  | 0.000100000.0                      |
| 12    | IP00121440        | Electron transfer flavoprotein subunit beta                                | 1169.7019        | 1.709837353      | 0.021          | VLAKLAEEK                        | Acetyl (K)                  | 0.0001000000.0                     |
| 13    | IP00121440        | Electron transfer flavoprotein subunit beta                                | 1643.9498        | 5.231303292      | 0.00019        | LAERKVDLFLGK                     | Acetyl (K)                  | 0.00000010000000.0                 |
| 14    | IP00122549        | Isolform PI-VDAC1 of Voltage-dependent anion-selective channel protein 1   | 1849.0057        | 3.299070414      | 0.013          | LITSLALDGNVNNAGGHK               | Acetyl (K)                  | 0.000000000000000000.0             |
| 15    | IP00122549        | Isolform PI-VDAC1 of Voltage-dependent anion-selective channel protein 1   | 2028.9615        | 3.302181929      | 4.20E-05       | FGIAAQVQDPDACSAR                 | Acetyl (K)                  | 0.00000100000000000.0              |
| 16    | IP00118986        | ATP synthase O subunit, mitochondrial precursor                            | 1297.6224        | 0.847704232      | 0.021          | IGEKYVDMSAK                      | Acetyl (K); Oxidation (M)   | 0.000100002000.0                   |
| 17    | IP00118986        | ATP synthase O subunit, mitochondrial precursor                            | 1386.8082        | 0.432648148      | 0.026          | TVKVSUNIDTK                      | Acetyl (K)                  | 0.000010000000.0                   |
| 18    | IP00118986        | ATP synthase O subunit, mitochondrial precursor                            | 1386.8082        | 3.605401237      | 0.1            | TVKVSUNIDTK                      | Acetyl (K)                  | 0.001000000000.0                   |
| 19    | IP00125460        | ATP synthase coupling factor 6, mitochondrial precursor                    | 931.5491         | 1.824917227      | 0.0096         | LFVDIKR                          | Acetyl (K)                  | 0.00000100.0                       |
| 20    | IP00125460        | ATP synthase coupling factor 6, mitochondrial precursor                    | 1103.5499        | 5.074532651      | 0.063          | FEVIDKPKS                        | Acetyl (K)                  | 0.000001000.0                      |
| 21    | IP00125460        | ATP synthase coupling factor 6, mitochondrial precursor                    | 1351.75          | 3.624930645      | 0.044          | LVQDKREYK                        | Acetyl (K)                  | 0.00000100000.0                    |
| 22    | IP00125460        | ATP synthase coupling factor 6, mitochondrial precursor                    | 1471.7922        | 3.465163085      | 0.0021         | LDPVQVLQVWK                      | Acetyl (K)                  | 0.00000000000000.0                 |
| 23    | IP00125460        | ATP synthase coupling factor 6, mitochondrial precursor                    | 1705.8199        | 1.641439404      | 0.0023         | FDDPKFEVIDKPKS                   | Acetyl (K)                  | 0.00000000000000.0                 |
| 24    | IP00125460        | ATP synthase coupling factor 6, mitochondrial precursor                    | 1705.8199        | -9.145162394     | 0.026          | FDDPKFEVIDKPKS                   | Acetyl (K)                  | 0.00001000000000.0                 |
| 25    | IP00125460        | ATP synthase coupling factor 6, mitochondrial precursor                    | 1747.8305        | 4.977599372      | 0.012          | FDDPKFEVIDKPKS                   | 2 Acetyl (K)                | 0.0000100000001000.0               |
| 26    | IP00125460        | ATP synthase coupling factor 6, mitochondrial precursor                    | 1815.8026        | 5.231846237      | 0.026          | GEMDTPFTFKFDDPK                  | Acetyl (K)                  | 0.000000000100000.0                |
| 27    | IP00125460        | ATP synthase coupling factor 6, mitochondrial precursor                    | 1831.7975        | 3.275471220      | 0.0038         | GEMDTPFTFKFDDPK                  | Acetyl (K); Oxidation (M)   | 0.0020000000100000.0               |
| 28    | IP00125460        | ATP synthase coupling factor 6, mitochondrial precursor                    | 1852.8012        | 2.320810241      | 1.00E-05       | QMVKGEMDTPFTFK                   | Acetyl (K); 2 Oxidation (M) | 0.02001002000000.0                 |
| 29    | IP00125460        | ATP synthase coupling factor 6, mitochondrial precursor                    | 2859.3313        | 12.870114205     | 0.023          | GEMDTPFTFKFDDPKFEVIDKPKS         | Acetyl (K)                  | 0.00000000000000000000.0           |
| 30    | IP00125460        | ATP synthase coupling factor 6, mitochondrial precursor                    | 2859.3313        | 6.050365692      | 0.037          | GEMDTPFTFKFDDPKFEVIDKPKS         | Acetyl (K)                  | 0.0000000001000000000000.0         |
| 31    | IP00125460        | ATP synthase coupling factor 6, mitochondrial precursor                    | 2875.3262        | 6.294937945      | 0.07           | GEMDTPFTFKFDDPKFEVIDKPKS         | Acetyl (K); Oxidation (M)   | 0.00200000000000010000000000.0     |
| 32    | IP00120076        | Creatine kinase, sarcomeric mitochondrial precursor                        | 1060.4553        | 4.652544127      | 0.042          | FSRLNLR                          | Acetyl (K)                  | 0.001000000.0                      |
| 33    | IP00120076, IP001 | Creatine kinase, sarcomeric mitochondrial precursor                        | 1266.5948        | 1.579036958      | 0.0062         | VSMKEGGNMK                       | Acetyl (K); 2 Oxidation (M) | 0.002001000020.0                   |
| 34    | IP00127596        | Creatine kinase M-type                                                     | 909.496          | 2.089069111      | 0.069          | GKYPLK                           | Acetyl (K)                  | 0.0100000.0                        |
| 35    | IP00127596        | Creatine kinase M-type                                                     | 947.5327         | 1.688596077      | 0.027          | IEEIFKK                          | Acetyl (K)                  | 0.00000010.0                       |
| 36    | IP00127596        | Creatine kinase M-type                                                     | 1043.5036        | 1.820789119      | 0.0023         | HGGYPTDK                         | Acetyl (K)                  | 0.000010000.0                      |
| 37    | IP00127596        | Creatine kinase M-type                                                     | 1048.6029        | 3.051679525      | 0.07           | LANLSKHPK                        | Acetyl (K)                  | 0.0000001000.0                     |
| 38    | IP00127596        | Creatine kinase M-type                                                     | 1080.5195        | -2.683894182     | 0.085          | LMVEMEKK                         | Acetyl (K); 2 Oxidation (M) | 0.020020100.0                      |
| 39    | IP00127596        | Creatine kinase M-type                                                     | 1230.6145        | 3.494189285      | 0.0075         | PFGNTHNKKF                       | Acetyl (K)                  | 0.000000001000.0                   |
| 40    | IP00127596        | Creatine kinase M-type                                                     | 1263.7299        | 2.848789997      | 0.0018         | GGVHRYLANLSK                     | Acetyl (K)                  | 0.00000000000000.0                 |
| 41    | IP00127596        | Creatine kinase M-type                                                     | 1310.6087        | 2.594077087      | 0.0071         | HPKFEELR                         | Acetyl (K)                  | 0.00000000000000.0                 |
| 42    | IP00127596        | Creatine kinase M-type                                                     | 1372.7714        | 3.933648385      | 0.0016         | VLTPDLYNKLK                      | Acetyl (K)                  | 0.000000001000.0                   |
| 43    | IP00127596        | Creatine kinase M-type                                                     | 1651.8643        | 5.266776454      | 5.50E-06       | FCVGLQKIEIFK                     | Acetyl (K)                  | 0.000000001000000.0                |
| 44    | IP00127596        | Creatine kinase M-type                                                     | 1733.9199        | 10.32342959      | 5.30E-05       | LSVEALNSTGEFGK                   | Acetyl (K)                  | 0.000000000000000000.0             |
| 45    | IP00127596        | Creatine kinase M-type                                                     | 1764.857         | 2.719767097      | 0.0043         | LVNKPQEEYPLSK                    | Acetyl (K)                  | 0.0001000000000000.0               |
| 46    | IP00127596        | Creatine kinase M-type                                                     | 1779.5953        | -6.797908244     | 0.00085        | FCVGLQKIEIFK                     | Acetyl (K)                  | 0.00000010000000.0                 |
| 47    | IP00127596        | Creatine kinase M-type                                                     | 1951.9574        | 3.944758221      | 0.079          | HNNHMAKVLTPDLYNK                 | Acetyl (K); Oxidation (M)   | 0.0000201000000000.0               |
| 48    | IP00127596        | Creatine kinase M-type                                                     | 1976.0466        | 8.957278639      | 4.90E-07       | AVEKLSVEALNSTGEFGK               | Acetyl (K)                  | 0.000100000000000000.0             |
| 49    | IP00127596        | Creatine kinase M-type                                                     | 2040.0204        | 1.813707353      | 0.00046        | FLNKNYKQEEYPLSK                  | Acetyl (K)                  | 0.0000001000000000.0               |
| 50    | IP00127596        | Creatine kinase M-type                                                     | 2040.0204        | 4.950930882      | 0.0024         | FLNKNYKQEEYPLSK                  | Acetyl (K)                  | 0.0100000000000000.0               |
| 51    | IP00127596        | Creatine kinase M-type                                                     | 2398.2784        | 10.17396479      | 0.00033        | LSVEALNSTGEFGKYKPLK              | Acetyl (K)                  | 0.00000000000000000000.0           |
| 52    | IP00127596        | Creatine kinase M-type                                                     | 2613.2307        | 1.913340449      | 0.001          | TDLNHNKLGDDLDPNVYLSR             | Acetyl (K)                  | 0.00000000000000000000.0           |
| 53    | IP00127596        | Creatine kinase M-type                                                     | 2878.3845        | 7.851626494      | 4.00E-05       | HKTDLNHNKLGDDLDPNVYLSR           | Acetyl (K)                  | 0.0000000000100000000000.0         |
| 54    | IP00127596        | Creatine kinase M-type                                                     | 3685.812         | -2.631713175     | 0.074          | SMTGEQQQLDHHFDKPVSPLLASGMAR      | Acetyl (K); Oxidation (M)   | 0.000000000000000000000000.0       |
| 55    | IP00127596, IP001 | Creatine kinase M-type                                                     | 3701.8069        | 3.133604835      | 0.0099         | SMTGEQQQLDHHFDKPVSPLLASGMAR      | Acetyl (K); Oxidation (M)   | 0.000000000000000000000000.0       |
| 56    | IP00127596        | Creatine kinase M-type                                                     | 3717.8018        | 12.45359556      | 0.00026        | SMTGEQQQLDHHFDKPVSPLLASGMAR      | Acetyl (K); 2 Oxidation (M) | 0.020000000000000000000000.0       |
| 57    | IP00127625        | Hydroxymethylglutaryl-CoA lyase, mitochondrial precursor                   | 1665.8937        | 4.080389756      | 9.40E-05       | DGLNKEISVPTPVK                   | Acetyl (K)                  | 0.000000100000000.0                |
| 58    | IP00127625        | Hydroxymethylglutaryl-CoA lyase, mitochondrial precursor                   | 1953.789         | 1.085270657      | 1.50E-05       | DGLNKEISVPTPVK                   | Acetyl (K)                  | 0.0000001000000000.0               |
| 59    | IP00130004        | Delta(2,5)-Delta(2,4)-dienoyl-CoA isomerase, mitochondrial precursor       | 836.4644         | 5.97754644       | 0.044          | SITSLK                           | Acetyl (K)                  | 0.00000010.0                       |
| 60    | IP00134809        | Dihydrolipoylysine-residue succinyltransferase component of 2-oxoglutarate | 899.4865         | 2.445839932      | 0.091          | HKDAFLK                          | Acetyl (K)                  | 0.0100000.0                        |
| 61    | IP00134809        | Dihydrolipoylysine-residue succinyltransferase component of 2-oxoglutarate | 1027.5814        | 1.654370155      | 0.07           | HKDAFLK                          | Acetyl (K)                  | 0.000000100.0                      |
| 62    | IP00134809        | Dihydrolipoylysine-residue succinyltransferase component of 2-oxoglutarate | 1532.8173        | 0.717632819      | 0.0051         | HNKLKGFMSAFVK                    | Acetyl (K)                  | 0.00010000000000.0                 |
| 63    | IP00145054        | Acetyl-CoA acetyltransferase, mitochondrial precursor                      | 932.5695         | 4.503685784      | 0.012          | VLKYAGLK                         | Acetyl (K)                  | 0.001000000.0                      |
| 64    | IP00145054        | Acetyl-CoA acetyltransferase, mitochondrial precursor                      | 960.528          | 0.624656439      | 0.022          | VDFSVPK                          | Acetyl (K)                  | 0.0000010000.0                     |
| 65    | IP00145054        | Acetyl-CoA acetyltransferase, mitochondrial precursor                      | 1060.6644        | 1.508488453      | 0.0023         | VLKYAGLK                         | Acetyl (K)                  | 0.001000000.0                      |
| 66    | IP00145054        | Acetyl-CoA acetyltransferase, mitochondrial precursor                      | 1700.9349        | 3.174724676      | 1.80E-07       | GATPGYGVKLEDLVVK                 | Acetyl (K)                  | 0.0000000001000000.0               |
| 67    | IP00145054        | Acetyl-CoA acetyltransferase, mitochondrial precursor                      | 1831.9316        | 6.332114147      | 0.0024         | GKPDVYKKEDEYR                    | Acetyl (K)                  | 0.000000100000000.0                |
| 68    | IP00145054        | Acetyl-CoA acetyltransferase, mitochondrial precursor                      | 2194.1365        | 4.0832131687     | 6.80E-05       | LAWDAWKGASFTPTTSVK               | Acetyl (K)                  | 0.00000000000000000000.0           |
| 69    | IP00145054        | Acetyl-CoA acetyltransferase, mitochondrial precursor                      | 2408.0736        | -0.539850609     | 0.042          | DGLDVTYNNKHMGKACNCAENTAK         | Acetyl (K); Oxidation (M)   | 0.00000000100200000000.0           |
| 70    | IP00145054        | Acetyl-CoA acetyltransferase, mitochondrial precursor                      | 2149.2635        | 5.084101945      | 6.50E-07       | SKEAWDAGKFASETIPTSVK             | Acetyl (K)                  | 0.0000000001000000000000.0         |
| 71    | IP00145054        | Acetyl-CoA acetyltransferase, mitochondrial precursor                      | 2706.4116        | 8.091895556      | 0.0077         | GATPGYGVKLEDLVKGDLTVNKK          | Acetyl (K)                  | 0.000000000100000000000000.0       |
| 72    | IP00145054        | Acetyl-CoA acetyltransferase, mitochondrial precursor                      | 2914.4494        | 9.847486115      | 0.011          | AGIPKEEYKVVYMGVNIQGGEGQAPTR      | Acetyl (K); Oxidation (M)   | 0.000010000000000000000000.0       |
| 73    | IP00145054        | Acetyl-CoA acetyltransferase, mitochondrial precursor                      | 3605.7995        | 7.40473784       | 0.0017         | TVDFKENGTTTAAANSTLDGAAALVMTAEAAQ | Acetyl (K); Oxidation (M)   | 0.000010000000000000000000000000.0 |
| 74    | IP00221402, IP001 | Fructose-bisphosphate aldolase A                                           | 1106.5145        | 3.524581015      | 0.017          | YGADQAKWVR                       | Acetyl (K)                  | 0.000000100.0                      |
| 75    | IP00221402, IP001 | Fructose-bisphosphate aldolase A                                           | 1529.8049        | 9.609096845      | 0.00012        | GILADESTGSIAGR                   | Acetyl (K)                  | 0.000000000000000010.0             |
| 76    | IP00221402        | Fructose-bisphosphate aldolase A                                           | 1109.5829        | 5.040743734      | 0.026          | LESLDAPR                         | Acetyl (K)                  | 0.00000010000000.0                 |
| 77    | IP00221402, IP006 | Fructose-bisphosphate aldolase A                                           | 1148.5825        | -0.251191512     | 0.0085         | AKAEYKVR                         | Acetyl (K)                  | 0.00000000100000.0                 |
| 78    | IP00221402, IP006 | Fructose-bisphosphate aldolase A                                           | 1849.9549        | 8.270471891      | 0.029          | CPLLKPWALTFSYGR                  | Acetyl (K)                  | 0.000010000000000.0                |
| 79    | IP00221402        | Fructose-bisphosphate aldolase A                                           | 2648.3778        | 6.645577531      | 0.0029         | CVLYKEGHTPSALAIMENANVLYAR        | Acetyl (K)                  | 0.000010000000000000000000.0       |
| 80    | IP00223092        | Hydroxyacyl-Coenzyme A dehydrogenase/3-ketoacyl-Coenzyme A thiolase/er     | 981.4841         | 4.483006098      | 0.00099        | MFEKLEK                          | Acetyl (K); Oxidation (M)   | 0.2001000.0                        |
| 81    | IP00223092        | Hydroxyacyl-Coenzyme A dehydrogenase/3-ketoacyl-Coenzyme A thiolase/er     | 1402.7205        | 6.701263723      | 0.00087        | GQQQVFKGLNDK                     | Acetyl (K)                  | 0.000000100000.0                   |
| 82    | IP00223092        | Hydroxyacyl-Coenzyme A dehydrogenase/3-ketoacyl-Coenzyme A thiolase/er     | 2115.0524        | 3.687851894      | 0.014          | DSFNSUGGLDLYKGFEK                | Acetyl (K)                  | 0.000000000000000010000.0          |
| 83    | IP00223092        | Hydroxyacyl-Coenzyme A dehydrogenase/3-ketoacyl-Coenzyme A thiolase/er     | 2624.2969        | 7.163823575      | 0.00054        | ALGEGQSDAGYLAESQKFGELALTK        | Acetyl (K)                  | 0.000000000000000000000000.0       |
| 84    | IP00133903        | Stress-70 protein, mitochondrial precursor                                 | 887.9644         | 1.014088621      | 0.002          | LKEEISK                          | Acetyl (K)                  | 0.0100000.0                        |
| 85    | IP00133903        | Stress-70 protein, mitochondrial precursor                                 | 1097.6345        | 2.095415186      | 0.037          | HNVEKFR                          | Acetyl (K)                  | 0.0000100000.0                     |
| 86    | IP00133903        | Stress-70 protein, mitochondrial precursor                                 | 1255.5524        | 2.133457515      | 0.00052        | NAEKYAEDDR                       | Acetyl (K)                  | 0.00000000000000000000.0           |
| 87    | IP00133903        | Stress-70 protein, mitochondrial precursor                                 | 1378.6252        | -1.885936801     | 0.0032         | YDPEVQKDTK                       | Acetyl (K)                  | 0.0000000010000.0                  |
| 88    | IP00133903        | Stress-70 protein, mitochondrial precursor                                 | 1421.6535        | 4.642481449      | 0.048          | NAEKYAEDDR                       | Acetyl (K)                  | 0.00001000000.0                    |
| 89    | IP00133903        | Stress-70 protein, mitochondrial precursor                                 | 1530.8406        | 0.065323588      | 3.60E-06       | AQFEGVTDLIKR                     | Acetyl (K)                  | 0.0000000000000000.0               |
| 90    | IP00133903        | Stress-70 protein, mitochondrial precursor                                 | 1534.7263        | 2.866960708      | 0.0072         | RYDPEVQKDTK                      | Acetyl (K)                  | 0.0000000000100.0                  |
| 91    | IP00133903        | Stress-70 protein, mitochondrial precursor                                 | 1711.9217        | 2.21972769       | 1.90E-06       | QATKDAGQISGLNVLNR                | Acetyl (K)                  | 0.000100000000000000.0             |
| 92    | IP00133903        | Stress-70 protein, mitochondrial precursor                                 | 1747.841         | 1.087055401      | 0.00017        | ETGVDLTKNMNLAR                   | Acetyl (K); Oxidation (M)   | 0.0000000010020000.0               |
| 93    | IP00133903        | Stress-70 protein, mitochondrial precursor                                 | 1963.9527        | -0.611012679     | 0.0085         | YDPEVQKDTKNVPFK                  | Acetyl (K)                  | 0.0000000000100000.0               |
| 94    | IP00133903        | Stress-70 protein, mitochondrial precursor                                 | 2933.4382        | 11.48822566      | 0.051          | ASNGDAWVVEAHGKLYSPSQGAFVLMK      | Acetyl (K); Oxidation (M)   | 0.000000000000000000000000.0       |
| 95    | IP00308885        | 60 kDa heat shock protein, mitochondrial precursor                         | 978.5022         | 5.132951564      | 0.017          | EGFEKSK                          | Acetyl (K)                  | 0.00001000.                        |



[illegible]

|     |                   |                                                                                |            |              |                                |                           |                              |
|-----|-------------------|--------------------------------------------------------------------------------|------------|--------------|--------------------------------|---------------------------|------------------------------|
| 384 | IP00131695        | Serum albumin precursor                                                        | 1544.8055  | 7.89743337   | 0.065 LQTCDDPLKK               | Acetyl (K)                | 0.000000100000.0             |
| 385 | IP00131695        | Serum albumin precursor                                                        | 2328.146   | 4.123452739  | 0.078 RPTCCALVDVETVPKEK        | Acetyl (K)                | 0.000000000000000000.0       |
| 386 | IP00131695        | Serum albumin precursor                                                        | 2612.1734  | 5.895473861  | 0.024 LQVETDFAKTVDAESAANCK     | Acetyl (K)                | 0.0000000000000000000000.0   |
| 387 | IP00132117, IP002 | similar to Histone H3.3                                                        | 1069.6243  | 5.60946223   | 0.020 QQLATAAAR                | 2 Acetyl (K)              | 0.1000001000.0               |
| 388 | IP00132347        | Adult male cerebellum cDNA, RIKEN full-length enriched library, clone:15000    | 1382.599   | 3.978015318  | 0.024 DQWTKYEEDK               | Acetyl (K)                | 0.0000001000000.0            |
| 389 | IP00132347        | Adult male cerebellum cDNA, RIKEN full-length enriched library, clone:15000    | 1402.6669  | 0            | 0.00071 KWYNNAAFGNK            | Acetyl (K)                | 0.100000000000.0             |
| 390 | IP00132347        | Adult male cerebellum cDNA, RIKEN full-length enriched library, clone:15000    | 1434.7619  | 0.104469635  | 0.026 HOLPKDQWTK               | Acetyl (K)                | 0.000000100000.0             |
| 391 | IP00132347        | Adult male cerebellum cDNA, RIKEN full-length enriched library, clone:15000    | 1551.7681  | -1.739950705 | 0.031 SAVSASSKVLDDGFR          | Acetyl (K)                | 0.0000000000000000.0         |
| 392 | IP00132347        | Adult male cerebellum cDNA, RIKEN full-length enriched library, clone:15000    | 1570.8708  | 0.335        | 0.035 PILEPKLVIR               | Acetyl (K)                | 0.0000000000000000.0         |
| 393 | IP00132347        | Adult male cerebellum cDNA, RIKEN full-length enriched library, clone:15000    | 1679.8631  | 3.512190964  | 0.00077 SAVSASSKVLDDGFR        | Acetyl (K)                | 0.0000000000000000.0         |
| 394 | IP00132347        | Adult male cerebellum cDNA, RIKEN full-length enriched library, clone:15000    | 1860.8981  | 1.23596256   | 0.00043 VYWNAGGNFLGLMIR        | Acetyl (K); Oxidation (M) | 0.0000000000100020.0         |
| 395 | IP00132347        | Adult male cerebellum cDNA, RIKEN full-length enriched library, clone:15000    | 2275.1412  | 6.109510917  | 0.015 YEEDKYFLEPKYKIVR         | Acetyl (K)                | 0.0000000000000000.0         |
| 396 | IP00132347        | Adult male cerebellum cDNA, RIKEN full-length enriched library, clone:15000    | 2317.1517  | 11.78170596  | 0.0042 YEEDKYFLEPKYKIVR        | 2 Acetyl (K)              | 0.0000100000000000.0         |
| 397 | IP00132347        | Adult male cerebellum cDNA, RIKEN full-length enriched library, clone:15000    | 2436.1525  | 5.33628384   | 0.00054 DQWTKYEEDKYFLEPKLV     | Acetyl (K)                | 0.00000000000000000.0        |
| 398 | IP00132456        | Protein C14orf166 homolog                                                      | 2683.2326  | 2.906940342  | 0.0078 KLTALDHPNSGFGNCKDETFE   | Acetyl (K)                | 0.0000000000000000000000.0   |
| 399 | IP00132474        | Integrin beta-1 precursor                                                      | 1533.8039  | 2.999079069  | 0.057 SAVTVVWPKYK              | Acetyl (K)                | 0.0000000000000000.0         |
| 400 | IP00132686        | Isolform 1 of Axi-1                                                            | 932.5807   | -9.54341023  | 0.054 VHTVTVVWPKYK             | Acetyl (K)                | 0.0000000000000000.0         |
| 401 | IP00132686        | cytochrome b5 h4                                                               | 1738.86679 | 0.003255077  | 2.105E-06 AFVETLVTEKEE         | Acetyl (K)                | 0.00000000000000000000.0     |
| 402 | IP00132958        | Thioesterase superfamily member 2                                              | 1085.4913  | 2.394946368  | 0.056 TQGLQAQR                 | Acetyl (K)                | 0.000010000000.0             |
| 403 | IP00132958        | Thioesterase superfamily member 2                                              | 1252.6274  | 3.033623566  | 0.046 VMFKYPGDFR               | Acetyl (K); Oxidation (M) | 0.002010000000.0             |
| 404 | IP00132958        | Thioesterase superfamily member 2                                              | 1524.8763  | 1.639477248  | 0.00056 VLECKVLVLSAAPE         | Acetyl (K)                | 0.000010000000000.0          |
| 405 | IP00132958        | Thioesterase superfamily member 2                                              | 1815.8495  | 6.883830406  | 0.00036 CLEMKEVEQHTNK          | Acetyl (K); Oxidation (M) | 0.000020000000000.0          |
| 406 | IP00132959        | HD domain-containing protein 3                                                 | 2601.0755  | -3.590358529 | 0.031 RKQPEGTPIYNHGIVAR        | Acetyl (K)                | 0.00100000000000000000.0     |
| 407 | IP00133006        | Acyl carrier protein, mitochondrial precursor                                  | 1161.5917  | 4.993148625  | 0.0048 LYDQIKPE                | Acetyl (K)                | 0.0000100000.0               |
| 408 | IP00133006        | Acyl carrier protein, mitochondrial precursor                                  | 1294.7536  | 5.638138407  | 4.30E-05 VLVVLVLVLYK           | Acetyl (K)                | 0.0000000000000000.0         |
| 409 | IP00133006        | Acyl carrier protein, mitochondrial precursor                                  | 1877.055   | 2.717102244  | 0.011 VLVVLVLVLYWPEK           | Acetyl (K)                | 0.0000000000000000.0         |
| 410 | IP00133044        | Histone H2af nucleosome transfer protein 2                                     | 1360.2099  | 3.527170425  | 0.061 IQAGQGLGDFR              | Acetyl (K)                | 0.0000000000000000.0         |
| 411 | IP00133284        | ES1 protein homolog, mitochondrial precursor                                   | 2783.3402  | 3.880229498  | 0.019 GVEYTVHQEEDGGKVPYAGTAEAK | Acetyl (K)                | 0.000000000000000000000000.0 |
| 412 | IP00133392        | Myosin light polypeptide 3                                                     | 1510.8355  | 6.023157385  | 0.084 VLQPKQKEELNK             | Acetyl (K)                | 0.0000001000000000.0         |
| 413 | IP00133392, IP001 | Myosin light polypeptide 3                                                     | 1763.8152  | 3.911894609  | 1.20E-05 VFQKEGNTVGMGAELR      | Acetyl (K)                | 0.0000100000000000.0         |
| 414 | IP00133403        | NADH dehydrogenase [ubiquinone] 1 beta subcomplex subunit 3                    | 1697.8988  | 7.656522825  | 0.015 QVQKQPLETLEQK            | Acetyl (K)                | 0.0010000000000000.0         |
| 415 | IP00133562        | Coiled-coil helix-coiled-coil helix domain-containing protein 3                | 1162.587   | 1.118195886  | 0.012 AAEEAEAKFK               | Acetyl (K)                | 0.0000000000000000.0         |
| 416 | IP00133562        | Coiled-coil helix-coiled-coil helix domain-containing protein 3                | 1537.7888  | 2.275995247  | 0.017 QDAPFYKQLAR              | Acetyl (K)                | 0.0000000000000000.0         |
| 417 | IP00133562        | Coiled-coil helix-coiled-coil helix domain-containing protein 3                | 1779.8203  | 2.921643269  | 0.0017 SSEFYVTITEYQK           | Acetyl (K)                | 0.0000001000000000.0         |
| 418 | IP00134131        | Isolform SCpx of Non-specific lipid-transfer protein                           | 1120.5645  | 6.246294051  | 0.015 IGDFYAFYK                | Acetyl (K)                | 0.0000000000000000.0         |
| 419 | IP00134131        | Isolform SCpx of Non-specific lipid-transfer protein                           | 1231.6812  | 2.110935489  | 0.0053 ANLVFEKKEK              | Acetyl (K)                | 0.0000000000000000.0         |
| 420 | IP00134131        | Isolform SCpx of Non-specific lipid-transfer protein                           | 1359.7622  | 1.764969328  | 0.051 ANLVFEKKEK               | Acetyl (K)                | 0.00000010000000.0           |
| 421 | IP00134131        | Isolform SCpx of Non-specific lipid-transfer protein                           | 1376.6823  | 4.86677282   | 0.015 LEEEGEYFKVK              | Acetyl (K)                | 0.0000000000000000.0         |
| 422 | IP00134131        | Isolform SCpx of Non-specific lipid-transfer protein                           | 1504.7773  | 4.85851141   | 0.00011 KLEEEGEYFKVK           | Acetyl (K); Oxidation (M) | 0.0000000000000000.0         |
| 423 | IP00134131        | Isolform SCpx of Non-specific lipid-transfer protein                           | 1552.7078  | -0.19320515  | 0.002 MMPOSAFFQGLK             | Acetyl (K); Oxidation (M) | 0.2000000000000000.0         |
| 424 | IP00134131        | Isolform SCpx of Non-specific lipid-transfer protein                           | 1598.7941  | 2.752074204  | 0.084 DPGGGEATVVVVQK           | Acetyl (K)                | 0.00000000000000000.0        |
| 425 | IP00134131        | Isolform SCpx of Non-specific lipid-transfer protein                           | 1825.9574  | 1.095315805  | 0.042 VKDGGPGEATVVVVQK         | Acetyl (K)                | 0.00000010000000000.0        |
| 426 | IP00134718        | Isolform 1 of Zinc finger protein 687                                          | 643.4268   | 1.865014016  | 0.0095 KTKT                    | Acetyl (K)                | 0.001000.0                   |
| 427 | IP00134743        | Alkaline phosphatase, tissue-nonspecific isozyme precursor                     | 1345.7202  | 0.743906522  | 0.025 DAGKSGVVTTR              | Acetyl (K)                | 0.0000000000000000.0         |
| 428 | IP00134743        | Alkaline phosphatase, tissue-nonspecific isozyme precursor                     | 1997.5441  | 1.904747162  | 0.1 EKLDNPK                    | Acetyl (K)                | 0.00100000000000.0           |
| 429 | IP00135660        | Serum deprivation-response protein                                             | 1544.4889  | 4.180631853  | 0.0043 LSKYQASTNYSVK           | Acetyl (K)                | 0.0000000000000000.0         |
| 430 | IP00136107        | Protein NDRG3                                                                  | 643.4268   | 1.865014016  | 0.0095 KTKT                    | Acetyl (K)                | 0.001000.0                   |
| 431 | IP00136683        | Acyl-coenzyme A thioesterase 2, mitochondrial precursor                        | 4030.7521  | 3.490644823  | 0.09 SALRDEGALFR               | Acetyl (K)                | 0.0000000000000000.0         |
| 432 | IP00137866        | Isolform 3A of Syntaxin-3                                                      | 1558.6933  | 4.490941226  | 0.0032 SMEEHEEDVR              | Acetyl (K); Oxidation (M) | 0.0020100000000000.0         |
| 433 | IP00138238        | Prefoldin subunit 6                                                            | 1662.9668  | -1.743871257 | 4.80E-05 LLGPIVLVKQELGAR       | Acetyl (K)                | 0.0000000000000000.0         |
| 434 | IP00138892, IP001 | Uba52 protein                                                                  | 1306.7319  | 7.80537326   | 3.70E-05 MOFVTKITGK            | Acetyl (K)                | 0.000000100000.0             |
| 435 | IP00147052, IP001 | ribosomal protein S27a                                                         | 1322.7268  | 3.931272883  | 0.00045 MLFVTKITGK             | Acetyl (K); Oxidation (M) | 0.2000000000000000.0         |
| 436 | IP00139788        | Transferrin precursor                                                          | 1535.8348  | 7.749234122  | 0.021 DLQFDSAGFLR              | Acetyl (K)                | 0.0000000000000000.0         |
| 437 | IP00153400        | H2a1 protein                                                                   | 5341.6888  | 5.449090031  | 0.017 NDELKLNKLR               | Acetyl (K)                | 0.0000000000000000.0         |
| 438 | IP00153576        | Tspan8 protein                                                                 | 1664.7893  | 8.109134291  | 0.0063 LLSDTDKADFQK            | Acetyl (K)                | 0.0000000000000000.0         |
| 439 | IP00154047        | 3-hydroxyisobutyryl-Coenzyme A hydrolase                                       | 1268.6976  | 4.650483871  | 0.0033 AVLDQDKTPK              | Acetyl (K)                | 0.00000010000000.0           |
| 440 | IP00169707, IP004 | Tropomyosin 3, gamma                                                           | 1600.8559  | 2.998396046  | 0.015 LEKTDLDLEK               | Acetyl (K)                | 0.0010000000000000.0         |
| 441 | IP00169707, IP004 | Tropomyosin 3, gamma                                                           | 1856.9016  | 1.400181894  | 0.061 HIAEADRYKEVAR            | Acetyl (K)                | 0.0000000000000000.0         |
| 442 | IP00170051        | Co-chaperone protein HscB, mitochondrial precursor                             | 2487.1554  | 4.95408719   | 0.0074 QKFTFNDSIAFGEDGFEKAK    | Acetyl (K)                | 0.0000000000000000000000.0   |
| 443 | IP00170093        | NADH dehydrogenase [ubiquinone] iron-sulfur protein 8, mitochondrial precursor | 1783.8298  | -0.784828239 | 0.00073 YVQKEGSESDVMK          | Acetyl (K); Oxidation (M) | 0.000010000000020.0          |
| 444 | IP00187468        | Isolform 4 of inhibitor of growth protein 4                                    | 1327.647   | 2.25841021   | 0.042 SKGNSEDEAPK              | 2 Acetyl (K)              | 0.00101000000000.0           |
| 445 | IP00187468        | Isolform 4 of inhibitor of growth protein 4                                    | 1508.8236  | 1.560871952  | 1.10E-08 QISSVSDSSSSGSKK       | 2 Acetyl (K)              | 0.00000000000000000000.0     |
| 446 | IP00221769        | GTP-AMP phosphotransferase mitochondrial                                       | 1056.5968  | 2.744660972  | 0.079 KTKT                     | Acetyl (K)                | 0.0010000000.0               |
| 447 | IP00221769        | GTP-AMP phosphotransferase mitochondrial                                       | 1692.847   | 0.708845033  | 0.014 HFEKLHSSGDLR             | Acetyl (K)                | 0.0000010000000000.0         |
| 448 | IP00221769        | GTP-AMP phosphotransferase mitochondrial                                       | 1905.9506  | 4.82687664   | 0.0082 FTGQKLPDQVDMTR          | Acetyl (K); Oxidation (M) | 0.0000001000000200.0         |
| 449 | IP00221769        | GTP-AMP phosphotransferase mitochondrial                                       | 1999.9891  | -1.80000981  | 4.80E-05 AYAEAGTEPLVQYQK       | Acetyl (K)                | 0.0000000000000000.0         |
| 450 | IP00221769        | GTP-AMP phosphotransferase mitochondrial                                       | 2035.1214  | 4.913711782  | 1.90E-07 IKTFEKLHSSGDLR        | Acetyl (K)                | 0.00000000000000000.0        |
| 451 | IP00221769        | GTP-AMP phosphotransferase mitochondrial                                       | 2035.1214  | 5.257671606  | 0.04 IKTFEKLHSSGDLR            | Acetyl (K)                | 0.001000000000000000.0       |
| 452 | IP00221769        | GTP-AMP phosphotransferase mitochondrial                                       | 2077.132   | 5.632766719  | 2.50E-05 IKTFEKLHSSGDLR        | 2 Acetyl (K)              | 0.001000000000000000.0       |
| 453 | IP00221769        | GTP-AMP phosphotransferase mitochondrial                                       | 2113.0741  | 5.820906054  | 3.40E-06 LKAEATEPLVQYQK        | Acetyl (K)                | 0.001000000000000000.0       |
| 454 | IP00221769        | GTP-AMP phosphotransferase mitochondrial                                       | 2135.687   | 0.215643476  | 0.036 LAHKLTKTCWMLDGLFR        | Acetyl (K); Oxidation (M) | 0.000000000000000000.0       |
| 455 | IP00221769        | GTP-AMP phosphotransferase mitochondrial                                       | 2822.4549  | 9.637000754  | 0.017 NDELKLNKLR               | Acetyl (K)                | 0.0000000000000000000000.0   |
| 456 | IP00221769        | GTP-AMP phosphotransferase mitochondrial                                       | 2978.556   | 14.90655203  | 0.025 TGVIDDLTGQLQREDKDPETVKR  | Acetyl (K)                | 0.000000000000000000000000.0 |
| 457 | IP00221890        | Carbonic anhydrase 3                                                           | 2340.1022  | -3.461387285 | 5.90E-05 DKHPDPSLPQVASYDPGSKAK | Acetyl (K)                | 0.0010000000000000000000.0   |
| 458 | IP00221890        | Carbonic anhydrase 3                                                           | 2421.2944  | 12.01836505  | 0.00071 YNTAEALQKPDGIAYGVFLK   | Acetyl (K)                | 0.0000000000000000000000.0   |
| 459 | IP00222419        | Cytochrome c, somatic                                                          | 1075.6277  | 1.346882041  | 0.0003 ADYLKAK                 | Acetyl (K)                | 0.0000000000000000.0         |
| 460 | IP00222430, IP006 | diazepam binding inhibitor isoform 1                                           | 1075.0887  | 2.324481429  | 0.014 AKWDSSWNK                | Acetyl (K)                | 0.0010000000.0               |
| 461 | IP00222430, IP006 | diazepam binding inhibitor isoform 1                                           | 1260.6251  | 0.872582975  | 0.047 GKAKWDSWNK               | Acetyl (K)                | 0.000010000000.0             |
| 462 | IP00222430, IP006 | diazepam binding inhibitor isoform 1                                           | 1264.6551  | 2.372188275  | 0.011 TYKVEDYK                 | Acetyl (K)                | 0.000010000000.0             |
| 463 | IP00222430, IP006 | diazepam binding inhibitor isoform 1                                           | 1316.587   | 4.430340923  | 0.084 AKWDSSWNK                | Acetyl (K)                | 0.0010000000.0               |
| 464 | IP00222430, IP006 | diazepam binding inhibitor isoform 1                                           | 1392.75    | 2.369413032  | 0.0031 TYKVEDYK                | Acetyl (K)                | 0.00000100000000.0           |
| 465 | IP00222430, IP006 | diazepam binding inhibitor isoform 1                                           | 2138.1331  | 1.730481686  | 5.70E-06 QATVGDVNTDRTGGTLQKPK  | Acetyl (K)                | 0.0000000000000000000000.0   |
| 466 | IP00222767        | Pyruvate dehydrogenase protein X component, mitochondrial precursor            | 2036.0287  | 5.25532867   | 2.70E-05 NILEKHSLDASQGLDLPJGR  | Acetyl (K)                | 0.0000000000000000000000.0   |
| 467 | IP00223016, IP002 | Isolform B3a16 of Troponin T, fast skeletal muscle                             | 857.4606   | 1.282857778  | 0.058 LAEKAR                   | Acetyl (K)                | 0.00000100.0                 |
| 468 | IP00223016        | Isolform B3a16 of Troponin T, fast skeletal muscle                             | 1210.6016  | 1.652071169  | 0.0032 QKQIDMTYR               | Acetyl (K); Oxidation (M) | 0.0010002000.0               |
| 469 | IP00223016, IP002 | Isolform B3a16 of Troponin T, fast skeletal muscle                             | 1673.8148  | 6.930276874  | 0.0027 IPEGEKVFDDQIK           | Acetyl (K)                | 0.0000001000000000.0         |
| 470 | IP00223016, IP002 | Isolform B3a16 of Troponin T, fast skeletal muscle                             | 1861.017   | 1.880692116  | 0.017 RKPDLNLSLDKLR            | Acetyl (K)                | 0.000000000000000000.0       |
| 471 | IP00223316        | Troponin I, fast skeletal muscle                                               | 1754.792   | 10.08666554  | 0.062 IDVKEQDMEVK              | Acetyl (K); Oxidation (M) | 0.0000000000000000.0         |
| 472 | IP00223317        | Troponin I, cardiac muscle                                                     | 17947.6452 | 5.045838474  | 0.00018 KNDAISLMGFR            | Acetyl (K); Oxidation (M) | 0.0000000000000000.0         |
| 473 | IP00223316        | Thiolase sulfurtransferase                                                     | 1514.856   | 5.275619806  | 2.30E-06 ALYSTWLEASIR          | Acetyl (K)                | 0.0000001000000000.0         |
| 474 | IP00223377        | Isolform 4 of Myelin basic protein                                             | 1841.885   | 1.08586564   | 0.0062 FSWGAEQKPGFGGYGTR       | Acetyl (K)                | 0.00000000000000000000.0     |
| 475 | IP00223377        | Isolform 4 of Myelin basic protein                                             | 1828.1171  | 9.715335625  | 0.00015 TQDENPVVHFNFVKNVIR     | Acetyl (K)                | 0.000000000000000000.0       |
| 476 | IP00224210        | Ubiquitin-cytochrome c reductase complex ubiquitinone-binding protein QP-C     | 1736.925   | 3.914964665  | 6.10E-05 AFSFYSGKIPNLVR        | Acetyl (K)                | 0.0000000000000000.0         |
| 477 | IP00224251        | similar to Heterogeneous nuclear ribonucleoprotein A1 (Helix-destabilizing p   | 1669.7849  | 3.59327194   | 0.0011 SSQSGGGGQYFAPKR         | Acetyl (K)                | 0.00000000000000000.0        |
| 478 | IP00224456        | Isolform 1 of Sarcalumenin precursor                                           | 2010.0938  | 2.28845042   | 0.0015 FGFNLEKLGIEVHPK         | Acetyl (K)                | 0.000000000000000000.0       |
| 479 | IP00224549        | Myosin regulatory light chain 2, skeletal muscle isoform                       | 1919.6605  | 2.755371827  | 0.092 VLDFEGKGTIK              | Acetyl (K)                | 0.000000100000.0             |
| 480 | IP00224549        | Myosin regulatory light chain 2, skeletal muscle isoform                       | 1214.6143  | 3.375551242  | 0.046 DGWIDRELR                | Acetyl (K)                | 0.0000000000000000.0         |
| 481 | IP00224549        | Myosin regulatory light chain 2, skeletal muscle isoform                       | 1325.725   | 2.941111113  | 0.0083 VLDFEGKGTIK             | Acetyl (K); Oxidation (M) | 0.00000010000000.0           |
| 482 | IP00224549        | Myosin regulatory light chain 2, skeletal muscle isoform                       |            |              |                                |                           |                              |



|     |                   |                                                                               |           |              |                                      |                           |                                      |
|-----|-------------------|-------------------------------------------------------------------------------|-----------|--------------|--------------------------------------|---------------------------|--------------------------------------|
| 640 | IP003331564       | TIB-55 B888 cDNA, RIKEN full-length enriched library, clone:1730035F24 prod   | 2103.1589 | 2.282281191  | 0.058 HSAVKALTGGAHLFKQNK             | 2 Acetyl (K)              | 0.00001000000000001000.0             |
| 641 | IP003331564       | TIB-55 B888 cDNA, RIKEN full-length enriched library, clone:1730035F24 prod   | 2518.3809 | 5.717959503  | 0.0027 ALTGGAHLFKQNKVVHVNFGK         | 2 Acetyl (K)              | 0.0000000000100100000000.C           |
| 642 | IP003331564       | TIB-55 B888 cDNA, RIKEN full-length enriched library, clone:1730035F24 prod   | 2524.3512 | 6.259034004  | 0.03 FQTQKIPNIYAIGDVVAGPMLAHK        | Acetyl (K)                | 0.000100000000000000000000.C         |
| 643 | IP003331564       | TIB-55 B888 cDNA, RIKEN full-length enriched library, clone:1730035F24 prod   | 2540.3461 | 3.149177193  | 0.049 FQTQKIPNIYAIGDVVAGPMLAHK       | Acetyl (K); Oxidation (M) | 0.000100000000000000000000.C         |
| 644 | IP00337893        | Pyruvate dehydrogenase E1 component alpha subunit, somatic form, mitoch       | 1459.7704 | 3.151180487  | 0.032 SKSGPMLALKDR                   | Acetyl (K); Oxidation (M) | 0.00000000001000.0                   |
| 645 | IP00338536        | Succinate dehydrogenase [ubiquinone] iron-sulfur protein, mitochondrial pre   | 1079.6491 | 3.33441671   | 0.0036 IKKFAFYR                      | Acetyl (K)                | 0.00100000.0                         |
| 646 | IP00338745        | Nonhistone chromosomal protein HMG-14                                         | 1184.6037 | 1.519495507  | 0.081 VSADGAAKAEPK                   | Acetyl (K)                | 0.0000000010000.0                    |
| 647 | IP00338785        | laminin B1 subunit 1                                                          | 1351.6507 | -2.071541116 | 0.0047 TLDELGEDEYK                   | Acetyl (K)                | 0.0000000000000000.0                 |
| 648 | IP00338785        | laminin B1 subunit 1                                                          | 2096.1477 | 4.579829942  | 1.40E-09 TLLAQANSKLQLEDLER           | Acetyl (K)                | 0.00000000000000000000.C             |
| 649 | IP00344004        | NADH dehydrogenase (Ubiquinone) 1 alpha subcomplex, 12                        | 1334.5778 | 4.271013464  | 0.038 YGNKYEDNKK                     | Acetyl (K)                | 0.0010000000.0                       |
| 650 | IP00353672        | XIN2                                                                          | 643.4268  | 1.865014016  | 0.0095 IKTLK                         | Acetyl (K)                | 0.001000.0                           |
| 651 | IP00354432        | isoform 1 of PRKC apoptosis WT1 regulator protein                             | 1268.7816 | 13.08341798  | 0.0043 TLLKVVVGQLTR                  | Acetyl (K)                | 0.000100000000.0                     |
| 652 | IP00377351        | Apopliprotein A-IV precursor                                                  | 2624.297  | 11.39352749  | 0.083 LAVEQFQKTDVTTQQLSTLFQDK        | Acetyl (K)                | 0.000000010000000000000000.C         |
| 653 | IP00377351        | Apopliprotein A-IV precursor                                                  | 2927.4335 | 3.791717216  | 0.0077 LQELHLPYAVDLQGDQITQTQEMK      | Acetyl (K); Oxidation (M) | 0.00000010000000000000000000.C       |
| 654 | IP00377396        | 41 kDa protein                                                                | 2607.1758 | 7.786202986  | 0.0065 QKDIFAMDDKSENEPENEAR          | Acetyl (K); Oxidation (M) | 0.0000000000000000000000.C           |
| 655 | IP00378446        | similar to ciliary rootlet coiled-coil, rootletin                             | 1114.5771 | -11.48417638 | 0.082 LQKEVQWR                       | Acetyl (K)                | 0.001000000.0                        |
| 656 | IP00380687        | Olfactory receptor Olfr429                                                    | 1069.6131 | 4.581095725  | 0.036 EELKALKR                       | 2 Acetyl (K)              | 0.001000010.0                        |
| 657 | IP00380895, IP004 | Myosin-3                                                                      | 1531.7994 | 12.20786482  | 0.000022 QAFQTQIEELKR                | Acetyl (K)                | 0.00000000000010.0                   |
| 658 | IP00380896        | Myosin-1                                                                      | 1128.6026 | -13.91100818 | 0.084 QLEEEIKAK                      | Acetyl (K)                | 0.000000100.0                        |
| 659 | IP00387379        | 2,4-dienoyl-CoA reductase, mitochondrial precursor                            | 1124.5172 | 1.867468101  | 0.0096 FEKEMIDR                      | Acetyl (K); Oxidation (M) | 0.001020000.0                        |
| 660 | IP00399483        | 40S ribosomal protein S30                                                     | 1276.718  | 3.524662455  | 0.0054 FVNVVPTFGKK                   | Acetyl (K)                | 0.000000000010.0                     |
| 661 | IP00399663        | Centromere associated protein-E                                               | 982.6175  | 1.221227996  | 0.05 IEKLKR                          | 2 Acetyl (K)              | 0.001001010.0                        |
| 662 | IP00400016        | Laminin subunit gamma-1 precursor                                             | 1846.8367 | 6.010276924  | 3.90E-05 LAQEVVDQDNQLMDR             | Acetyl (K); Oxidation (M) | 0.0000010000000000000000.C           |
| 663 | IP00400154        | isoform 1 of Clathrin interactor 1                                            | 1406.3261 | 6.711236416  | 0.078 QDAFANFANFSK                   | Acetyl (K)                | 0.0000000000010.0                    |
| 664 | IP00400340, IP004 | LIM domain binding 3 isoform c                                                | 1465.7776 | 3.001819648  | 0.0033 DSALSTHKPIEVK                 | Acetyl (K)                | 0.00000001000000.0                   |
| 665 | IP00404365        | 0 day neonate head cDNA, RIKEN full-length enriched library, clone:48334421   | 791.4541  | 7.707332617  | 0.014 FLNLTN                         | Acetyl (K)                | 0.100000.0                           |
| 666 | IP00404837        | Myosin-4                                                                      | 1341.7504 | 5.291595218  | 0.092 LQDLVDKLQTK                    | Acetyl (K)                | 0.0000000100000.0                    |
| 667 | IP00404837        | Myosin-4                                                                      | 1822.8584 | 8.942000103  | 0.000024 QKYETQAELEASQK              | Acetyl (K)                | 0.0100000000000000.0                 |
| 668 | IP00404837        | Myosin-4                                                                      | 2609.282  | 6.668501143  | 0.053 SELOASLEEAESAHEEGKILR          | Acetyl (K)                | 0.000000000000000000000000.C         |
| 669 | IP00405518        | multiple C2 domains, transmembrane 1                                          | 876.5069  | 4.335390857  | 0.047 AVLVKNK                        | Acetyl (K)                | 0.00001000.0                         |
| 670 | IP00405699        | Delta-1-pyrroline-5-carboxylate dehydrogenase, mitochondrial precursor        | 1512.8704 | 1.255890789  | 0.013 LYVPKSLWPQIK                   | Acetyl (K)                | 0.000010000000.0                     |
| 671 | IP00408626        | Tumor protein DS2                                                             | 1263.6346 | 2.215830431  | 0.014 SEEFERNLK                      | Acetyl (K)                | 0.0000100000.0                       |
| 672 | IP00420261        | High mobility group protein B1                                                | 1239.5805 | 6.050433998  | 0.094 EKGGFEDMAK                     | Acetyl (K); Oxidation (M) | 0.000010000000.0                     |
| 673 | IP00420261, IP004 | High mobility group protein B1                                                | 1761.8686 | 2.781138162  | 0.06 KHPDASVNFSEFSKK                 | Acetyl (K)                | 0.0000000000000010.0                 |
| 674 | IP00421223        | Tropomyosin alpha-4 chain                                                     | 1730.7886 | 9.417672384  | 0.018 YSEKDEKYEEIK                   | Acetyl (K)                | 0.000000010000000.0                  |
| 675 | IP00453777        | ATP synthase delta chain, mitochondrial precursor                             | 1340.7187 | -7.384099289 | 0.0012 IEANEALVKALE                  | Acetyl (K)                | 0.0000000001000.0                    |
| 676 | IP00453777        | ATP synthase delta chain, mitochondrial precursor                             | 1971.9497 | -1.62275945  | 5.00E-08 ANLEKAQSELSGAADAEAR         | Acetyl (K)                | 0.0000100000000000000000.C           |
| 677 | IP00454049        | Enoyl-CoA hydratase, mitochondrial precursor                                  | 1578.746  | 3.103729162  | 1.80E-06 AFAAGADIKMQNR               | Acetyl (K); Oxidation (M) | 0.0000000000010000.C                 |
| 678 | IP00454201        | Kynurenine aminotransferase III                                               | 1512.7758 | 6.279846624  | 0.023 ALSCLQKIKYQR                   | Acetyl (K)                | 0.000000010000.0                     |
| 679 | IP00458405        | 4 days neonate male adipose cDNA, RIKEN full-length enriched library, clone:  | 748.4541  | 1.614087541  | 0.023 SKVIQK                         | Acetyl (K)                | 0.00100000.0                         |
| 680 | IP004593280       | Scavenger mRNA decapping enzyme Dcp2                                          | 1655.8883 | -1.841715406 | 0.036 TTVPPATEKHQIK                  | Acetyl (K)                | 0.00000000010000.C                   |
| 681 | IP00459570, IP007 | 12 days neonate thymus thymic cells cDNA, RIKEN full-length enriched library, | 1729.8046 | 4.599179823  | 0.0017 YSEKDEKYEEIK                  | Acetyl (K)                | 0.00010000000000.0                   |
| 682 | IP00459725        | isoform 1 of Isocitrate dehydrogenase [NAD] subunit alpha, mitochondrial pr   | 1087.5873 | 2.574505973  | 0.0083 LITEASKR                      | Acetyl (K)                | 0.0000000010.0                       |
| 683 | IP00459725        | isoform 1 of Isocitrate dehydrogenase [NAD] subunit alpha, mitochondrial pr   | 2051.051  | 8.53211047   | 0.049 NVTAIQPGGKGMIPPEAK             | Acetyl (K); Oxidation (M) | 0.0000000000000000000000.C           |
| 684 | IP00461741        | 2410066E13Rik protein                                                         | 1383.7762 | 10.69537112  | 0.037 TLHEVLKVKF                     | Acetyl (K)                | 0.000000010000.0                     |
| 685 | IP00461872        | LOC624610 protein (Fragment)                                                  | 911.5804  | 2.413391073  | 0.02 VKKVQVK                         | 2 Acetyl (K)              | 0.00100000.0                         |
| 686 | IP00461964        | NOD-derived CD11c +ve dendritic cells cDNA, RIKEN full-length enriched libra  | 1323.7074 | 9.443174526  | 0.05 FLIDGKFVESK                     | Acetyl (K)                | 0.000000100000.0                     |
| 687 | IP00462365        | Purkinje cell protein 4-like 1                                                | 1115.6451 | 4.212809253  | 0.015 AALAIQGFKR                     | Acetyl (K)                | 0.000000001000.0                     |
| 688 | IP00462934        | Activated spleen cDNA, RIKEN full-length enriched library, clone:F830029A18   | 1283.7449 | 1.557941924  | 0.05 AGLVIGKGGETIK                   | Acetyl (K)                | 0.00000010000000.0                   |
| 689 | IP00465880        | 40S ribosomal protein S17                                                     | 1225.6706 | 3.508283547  | 0.05 VIERVYTR                        | Acetyl (K)                | 0.000010000.0                        |
| 690 | IP00466657        | Cax1 protein                                                                  | 2542.7023 | 10.91444328  | 0.0051 KYEVALLYHEPPEDDKASQR          | Acetyl (K)                | 0.100000000000000000000000.C         |
| 691 | IP00467833        | Trisaccharide isomerase                                                       | 1772.8806 | 7.896752889  | 0.03 GVLKSNVNDGVAQSTR                | Acetyl (K)                | 0.0001000000000000.C                 |
| 692 | IP00467833        | Trisaccharide isomerase                                                       | 3070.5863 | 9.509584538  | 0.0023 ELASQPDVDGFLVGGASLKPEFVDINAK  | Acetyl (K)                | 0.000000000000000000000000.C         |
| 693 | IP00467833        | Trisaccharide isomerase                                                       | 3198.6449 | 7.503177361  | 0.0075 ELASQPDVDGFLVGGASLKPEFVDINAKQ | Acetyl (K)                | 0.000000000000000000000000.C         |
| 694 | IP00467841        | 12 days pregnant adult female placenta cDNA, RIKEN full-length enriched libr  | 1409.598  | 5.178781468  | 0.053 MKADTQSEER                     | Acetyl (K); Oxidation (M) | 0.210000000000.0                     |
| 695 | IP00467841, IP007 | 12 days pregnant adult female placenta cDNA, RIKEN full-length enriched libr  | 1795.8741 | 4.788754401  | 0.000033 VFDDKNGVYSAAELR             | Acetyl (K)                | 0.000010000000000000.C               |
| 696 | IP00467841, IP007 | 12 days pregnant adult female placenta cDNA, RIKEN full-length enriched libr  | 1885.8945 | 0.583275951  | 5.90E-07 EAFSLFDKDGDDGTTTK           | Acetyl (K)                | 0.0000000000000000000000.C           |
| 697 | IP00468203        | Annexin A2                                                                    | 1443.7293 | 3.788843492  | 0.0032 SVCHLQKVFER                   | Acetyl (K)                | 0.000000100000.0                     |
| 698 | IP00468516        | DNA segment, Chr 6, Wayne State University 116, expressed                     | 1299.7034 | 2.846803355  | 0.036 KQVGLQIGETK                    | Acetyl (K)                | 0.10000000000000.0                   |
| 699 | IP00469114        | Hemoglobin subunit alpha                                                      | 1230.6456 | 3.494100982  | 0.002 VLSGEDKSNIK                    | Acetyl (K)                | 0.00000010000.0                      |
| 700 | IP00469114        | Hemoglobin subunit alpha                                                      | 2084.0075 | 0.671782611  | 4.40E-05 AAWGGGGHGAEGAELER           | Acetyl (K)                | 0.0000100000000000000000.C           |
| 701 | IP00469114        | Hemoglobin subunit alpha                                                      | 2887.364  | -2.00875262  | 0.097 MFASFPTTKTYFPHFDVSHGSAQVK      | Acetyl (K); Oxidation (M) | 0.200000000100000000000000000000.C   |
| 702 | IP00469290        | IRF2 (Fragment)                                                               | 926.541   | -10.68490222 | 0.03 ARKGNALR                        | Acetyl (K)                | 0.001000000.0                        |
| 703 | IP00469307        | Alpha-2-macroglobulin receptor-associated protein precursor                   | 1433.7765 | 2.092376322  | 0.014 NKEKYVLEEK                     | Acetyl (K)                | 0.0000000000.0                       |
| 704 | IP00469840        | dimerization cofactor of hepatocyte nuclear factor 1 (HNF1) from muscle       | 1231.6812 | 8.443743397  | 0.03 DVKLQAFIEK                      | Acetyl (K)                | 0.00100000000.0                      |
| 705 | IP00469840        | dimerization cofactor of hepatocyte nuclear factor 1 (HNF1) from muscle       | 1302.7183 | 4.452228851  | 0.019 LAQFIEKAASAL                   | Acetyl (K)                | 0.0000000100000.0                    |
| 706 | IP00470152        | ribosomal protein S27a                                                        | 1775.7317 | -3.54783268  | 0.011 CLCTYCFNKPEDK                  | Acetyl (K)                | 0.000000000100000.0                  |
| 707 | IP00470178        | Cysteine and glycine-rich protein 2                                           | 1029.5611 | 2.808098662  | 0.0063 FQKRYGSAEK                    | Acetyl (K)                | 0.00001000000.0                      |
| 708 | IP00471246        | Isovaleryl-CoA dehydrogenase, mitochondrial precursor                         | 1666.9042 | 0.5999145    | 2.40E-05 NTSKFLQENLAPK               | Acetyl (K)                | 0.00001000000000.C                   |
| 709 | IP00471246        | Isovaleryl-CoA dehydrogenase, mitochondrial precursor                         | 1732.838  | 8.021523074  | 8.20E-06 AQEIDDTNDQFNLR              | Acetyl (K)                | 0.0000000000010000.C                 |
| 710 | IP00471441        | Ptms protein                                                                  | 1729.9097 | 9.075618224  | 0.1 VSEAAELSADLKEK                   | Acetyl (K)                | 0.000000000001000000.C               |
| 711 | IP00473475        | GTP cyclohydrolase 1 feedback regulatory protein                              | 1158.6318 | 11.73798268  | 0.059 VLDLCKEK                       | Acetyl (K)                | 0.0000100000.0                       |
| 712 | IP00474756, IP004 | 29 kDa protein                                                                | 2002.0292 | -0.749239821 | 0.000053 ALKDEKMELQEILK              | Acetyl (K); Oxidation (M) | 0.00100000200000000000.C             |
| 713 | IP00480401        | Major urinary protein 1                                                       | 1512.7871 | 2.97464197   | 0.0034 FAQLCEKHGILR                  | Acetyl (K)                | 0.0000000100000.0                    |
| 714 | IP00553333        | Hemoglobin subunit beta-1                                                     | 2316.1168 | -1.899731482 | 6.50E-07 AAVSGLWGVKSVNSDEVGGEALGR    | Acetyl (K)                | 0.00000000010000000000000000.C       |
| 715 | IP00553784        | PEST proteolytic signal-containing nuclear protein                            | 1561.7372 | 1.984969046  | 0.0022 DTPTSAGPNSFNKGK               | Acetyl (K)                | 0.00000000000000100.0                |
| 716 | IP00562132        | PEST proteolytic signal-containing nuclear protein                            | 1613.7784 | 5.143209254  | 0.0059 SAEDEAQDPTWPTK                | Acetyl (K)                | 0.00000000000000000000.C             |
| 717 | IP00555989, IP006 | Peptidyl-prolyl cis-trans isomerase A                                         | 1420.7802 | 4.856554963  | 6.10E-05 VSEFLFAQKVPK                | Acetyl (K)                | 0.00000000010000.0                   |
| 718 | IP00555023        | Glutathione S-transferase P 1                                                 | 1803.9043 | 4.434825063  | 0.0001 GKYTLTYTNYENGK                | Acetyl (K)                | 0.0100000000000000.0                 |
| 719 | IP00555059, IP007 | Peroxisredoxin-6                                                              | 972.5392  | 1.645177901  | 0.075 LAPEFAKR                       | Acetyl (K)                | 0.00000010.0                         |
| 720 | IP00555059, IP007 | Peroxisredoxin-6                                                              | 1203.6499 | 0.49848382   | 0.02 GVFTKELPSGK                     | Acetyl (K)                | 0.000001000000.0                     |
| 721 | IP00606944        | similar to 60S ribosomal protein L7a                                          | 1036.6644 | 0.578779401  | 0.046 KVAPAPAVVK                     | Acetyl (K)                | 0.10000000000.0                      |
| 722 | IP00606952        | 18-day embryo whole body cDNA, RIKEN full-length enriched library, clone:1:   | 1468.7999 | 4.697712738  | 0.024 SLKYPVAVMLK                    | Acetyl (K); Oxidation (M) | 0.0010000000200.0                    |
| 723 | IP00623382        | MORC family CW-type zinc finger protein 2A                                    | 857.4606  | 1.282857728  | 0.058 LAEEKAR                        | Acetyl (K)                | 0.00001000.0                         |
| 724 | IP00625287        | isoform 6 of LIM domain-binding protein 3                                     | 1702.7434 | 2.760251486  | 0.039 TTSKPEDEADEWAR                 | Acetyl (K)                | 0.00010000000000.C                   |
| 725 | IP00626132        | Hydroxyacyl-Coenzyme A dehydrogenase type II                                  | 2465.433  | 3.853278511  | 0.00058 AAARVSKVLGVAVVTGGASGLGLATAK  | Acetyl (K)                | 0.00000000000000000000000000.C       |
| 726 | IP00626455        | isoform 1 of Coiled-coil domain-containing protein B4                         | 955.545   | 7.639619275  | 0.091 QLKGAELR                       | Acetyl (K)                | 0.001000000.0                        |
| 727 | IP00632327        | Beta-1 globin (Fragment)                                                      | 1509.7762 | -11.45865195 | 0.029 VMAAGVATALAHKYH                | Acetyl (K)                | 0.000000000001000.C                  |
| 728 | IP00667117        | Acyl-CoA-binding protein                                                      | 1690.8162 | 0.768859442  | 0.027 SQAEFDKAAEEYKR                 | 2 Acetyl (K)              | 0.000000010000010.C                  |
| 729 | IP00751878, IP007 | 22 kDa protein                                                                | 1729.8046 | 2.832689889  | 5.00E-05 YSQEKDEKYEEIK               | Acetyl (K)                | 0.00000010000000.0                   |
| 730 | IP00751971        | similar to protein kinase C binding protein 1 isoform 2                       | 1218.7084 | -5.333515384 | 0.046 KTKIFNSALR                     | Acetyl (K)                | 0.0010000000.0                       |
| 731 | IP00757372        | similar to isochorismatase domain containing 2                                | 1468.731  | 2.38300995   | 0.087 DASHPOFKEIQK                   | Acetyl (K)                | 0.00000000100000.0                   |
| 732 | IP00757881        | similar to Urinary protein 1 precursor                                        | 1633.6105 | -11.93674992 | 0.041 MNCCNNKSCFNK                   | Acetyl (K); Oxidation (M) | 0.200000100000.0                     |
| 733 | IP00761696        | Calmodulin                                                                    | 3430.6304 | 12.85478028  | 0.06 ADQLTEEQIAEFKEAFLSKFDKDGDTTITK  | 2 Acetyl (K)              | 0.00000000000010000000100000000000.C |
